# Supplementary material for: A concise asymmetric total synthesis for structure elucidation of 5,6-secoiridoid from Incarvillea argute
Source: Royal Society of Chemistry journal article supplement (doi:10.1039/c6ra15153a), 2016-01-01
Supplement: c6ra15153a1.pdf [file c6ra15153a1.pdf]

**Electronic Supplementary Information (ESI)**

**A concise asymmetric total synthesis for structure elucidation of  
5,6-secoiridoid from *Incarvillea argute* ‡**

**Jian-Jun Fu,<sup>‡a</sup> Zhi-Qian Liu,<sup>‡b</sup> Hui-Zi Jin,<sup>c</sup> Shou-De Zhang,<sup>a</sup> Qing-Yan Sun,<sup>\*d</sup> and Wei-Dong Zhang<sup>\*abd</sup>**

*<sup>a</sup> Shanghai Key Laboratory of New Drug Design, School of Pharmacy, East China University of Science and Technology, Shanghai 200237, PRChina*

*<sup>b</sup> School of Pharmacy, Second Military Medical University, Shanghai 200433, PRChina. E-mail: [wdzhangy@hotmail.com](mailto:wdzhangy@hotmail.com); Tel/Fax: +86-21-81871244*

*<sup>c</sup> School of Pharmacy, Shanghai Jiao Tong University, Shanghai 200240, PR China*

*<sup>d</sup> Shanghai Institute of Pharmaceutical Industry, Shanghai 200040, PR China. E-mail: [sqy\\_2000@163.com](mailto:sqy_2000@163.com); Tel/Fax: +86-21-20572000-2028*

*‡ These authors contributed equally to this work.*

# Contents

## I. General Experimental Procedures

## II. Plant Material

## III. Extraction and Isolation

## IV. Cytotoxicity Assay

## V. Spectra of secoarguterin

Figure S1. The positive HR-ESI-MS spectrum of secoarguterin

Figure S2. The  $^1\text{H}$  NMR spectrum of secoarguterin (500 MHz,  $\text{CDCl}_3$ )

Figure S3. The  $^{13}\text{C}$  NMR spectrum of secoarguterin (125MHz,  $\text{CDCl}_3$ )

Figure S4. DEPT NMR spectrum of secoarguterin (125MHz,  $\text{CDCl}_3$ )

Figure S5. The  $^1\text{H}$ - $^1\text{H}$  COSY NMR spectrum of secoarguterin (500 MHz,  $\text{CDCl}_3$ )

Figure S6. The HSQC spectrum of secoarguterin (500 MHz,  $\text{CDCl}_3$ )

Figure S7. The HMBC spectrum of secoarguterin (500 MHz,  $\text{CDCl}_3$ )

Figure S8. The NOESY spectrum of secoarguterin (500 MHz,  $\text{CDCl}_3$ )

## VI. Synthesis Experimental Procedures and Spectroscopic Data of Compounds

## VII. Spectra of compounds

Figure S9. The  $^1\text{H}$  NMR spectrum of compound 4 (500 MHz,  $\text{CDCl}_3$ )

Figure S10. The  $^{13}\text{C}$  NMR spectrum of compound 4 (125MHz,  $\text{CDCl}_3$ )

Figure S11. The  $^1\text{H}$  NMR spectrum of compound 5 (500 MHz,  $\text{CDCl}_3$ )

Figure S12. The  $^{13}\text{C}$  NMR spectrum of compound 5 (125MHz,  $\text{CDCl}_3$ )

Figure S13. The  $^1\text{H}$  NMR spectrum of compound 6 (500 MHz,  $\text{CDCl}_3$ )

Figure S14. The  $^{13}\text{C}$  NMR spectrum of compound 6 (125MHz,  $\text{CDCl}_3$ )

Figure S15. The  $^1\text{H}$  NMR spectrum of compound 7 (500 MHz,  $\text{CDCl}_3$ )

Figure S16. The  $^{13}\text{C}$  NMR spectrum of compound 7 (125MHz,  $\text{CDCl}_3$ )

Figure S17. The  $^1\text{H}$  NMR spectrum of compound 8 (500 MHz,  $\text{CDCl}_3$ )

Figure S18. The  $^{13}\text{C}$  NMR spectrum of compound 8 (125MHz,  $\text{CDCl}_3$ )

Figure S19. The  $^1\text{H}$  NMR spectrum of compound 1 (500 MHz,  $\text{CDCl}_3$ )

Figure S20. The  $^{13}\text{C}$  NMR spectrum of compound 1 (125MHz,  $\text{CDCl}_3$ )

Figure S21. The  $^1\text{H}$  NMR spectrum of compound 9 (500 MHz,  $\text{CDCl}_3$ )

Figure S22. The  $^{13}\text{C}$  NMR spectrum of compound 9 (125MHz,  $\text{CDCl}_3$ )

## VIII. Crystal data and structure refinement of compound 9

## IX. Comparison of the Spectra of Natural and Synthetic Secoarguterin

### I. General Experimental Procedures

NMR spectra were determined on 500 MHz NMR instruments, for  $^1\text{H}$ -NMR at 500 MHz and  $^{13}\text{C}$ -NMR at 125 MHz. The following abbreviations are used in reporting NMR data: s, singlet; d, doublet; t, triplet; q, quartet; dd, doublet of doublets; dq, doublet of quartets; dt, doublet of triplets; qt, quartet of triplets; m, multiplets. ESI-MS spectra were recorded on Varian MAT-212 mass spectrometer. The time-of flight (TOF)-ESI spectra were carried out on a Q-ToF micro YA019 mass spectrometer. IR spectra were recorded with a Bruker FTIR Vector 22 spectrometer. Optical rotations were obtained with a Perkin-Elmer 341 polarimeter. UV spectra were recorded with a Shimadzu UV-2550 spectrophotometer. Thin layer chromatography (TLC) was performed on HSGF<sub>254</sub> silica gel plates (10–40 mm, Yantai, China), and were visualized with UV light and aqueous  $\text{KMnO}_4$  solution. Column chromatography was performed on silicagel (100–200, 200–300 mesh, Yantai, China), and silica gel H (10–40 mm, Qingdao, China). HPLC was performed using a system composed of a SHIMADZU LC-6AD pump, a SHIMADZU UV-VIS detector SPD-20A, a SHIMADZU 7725 injection port, and a preparative column (PRC-ODS, 20 mm i.d. 250 mm, 15 mm, Japan). A preparative column (Shimadzu PRC-ODS EV0233) was used for preparative HPLC (Shimadzu LC-6AD). Unless otherwise noted, all reactions were performed under an argon atmosphere using flame-dried glassware. Tetrahydrofuran (THF) and toluene were distilled over sodium-benzophenone ketyl. Methylene chloride ( $\text{CH}_2\text{Cl}_2$ ), and triethylamine ( $\text{Et}_3\text{N}$ ) were distilled from calcium hydride ( $\text{CaH}_2$ ) and stored under an argon atmosphere. Methanol (MeOH) was distilled from magnesium and stored under an argon atmosphere. Anhydrous *N,N*-dimethyl-Formamide (DMF), anhydrous Dimethyl Sulfoxide (DMSO), and other reagents were purchased at the highest commercial quality and used without further purification, unless otherwise stated.

### II. Plant Material

The roots of *I. arguta* were collected from Anning, Yunnan Province, P. R. China, in May 2006 and identified by Prof. Bao-kang Huang, School of Pharmacy, Second Military Medical University. The voucher specimens (LTM20060514) were deposited with the Herbarium of the School of Pharmacy, Shanghai Jiao Tong University, Shanghai, P. R. China.

### III. Extraction and Isolation

The dried roots (24.9 kg) of *I. arguta* were chopped and extracted with 80% EtOH at room temperature. The extract was dissolved in water to form a suspension and acidified to pH = 2 with 20% H<sub>2</sub>SO<sub>4</sub> and filtered. The filtrate was basified to pH = 10 with saturated NaHCO<sub>3</sub> aqueous solution and then extracted successively with CHCl<sub>3</sub>. The CHCl<sub>3</sub> fraction was chromatographed over a silica gel column with a gradient CH<sub>2</sub>Cl<sub>2</sub>/MeOH (1:0→0:1) to give fourteen fractions 1-14. Fraction 7 was separated on a silica gel column (CH<sub>2</sub>Cl<sub>2</sub>/MeOH, 1:0→10:1) and further purified on preparative HPLC (MeOH/H<sub>2</sub>O, 50:50) to yield **1** (5.5 mg).

### IV. Cytotoxicity Assay

A cytotoxicity assay was carried out according to Denizot and Lang. Each cell (conc.  $1 \times 10^4$ ) was seeded in each well containing 100  $\mu$ l of DMEM (Dulbecco's modified Eagle's medium). Subsequently, various concentrations of samples were added. The cells were incubated for 48 h at 37°C in an atmosphere containing 5% of CO<sub>2</sub>. Then 10  $\mu$ l of FBS-free medium (FBS = fetal bovine serum) containing 5 mg/ml of MTT (3-(4,5-dimethylthiazol-2-yl)-2,5-diphenyl-2H-tetrazolium) solution was added to the wells. After 4 h of incubation at 37°C, the medium was discarded, and the formazan blue formed in the cells was dissolved by adding 100  $\mu$ l of DMSO. The optical density was measured at 570 nm with a microplate reader.

### V. Spectral of secoarguterin

Figure S1. The positive HR-ESI-MS spectrum of secoarguterin

## Elemental Composition Report

Page 1

Tolerance = 20.0 PPM / DBE: min = -4.5, max = 50.0

Isotope cluster parameters: Separation = 1.0 Abundance = 1.0%

Monoisotopic Mass, Odd and Even Electron Ions

2 formula(e) evaluated with 1 results within limits (up to 50 closest results for each mass)

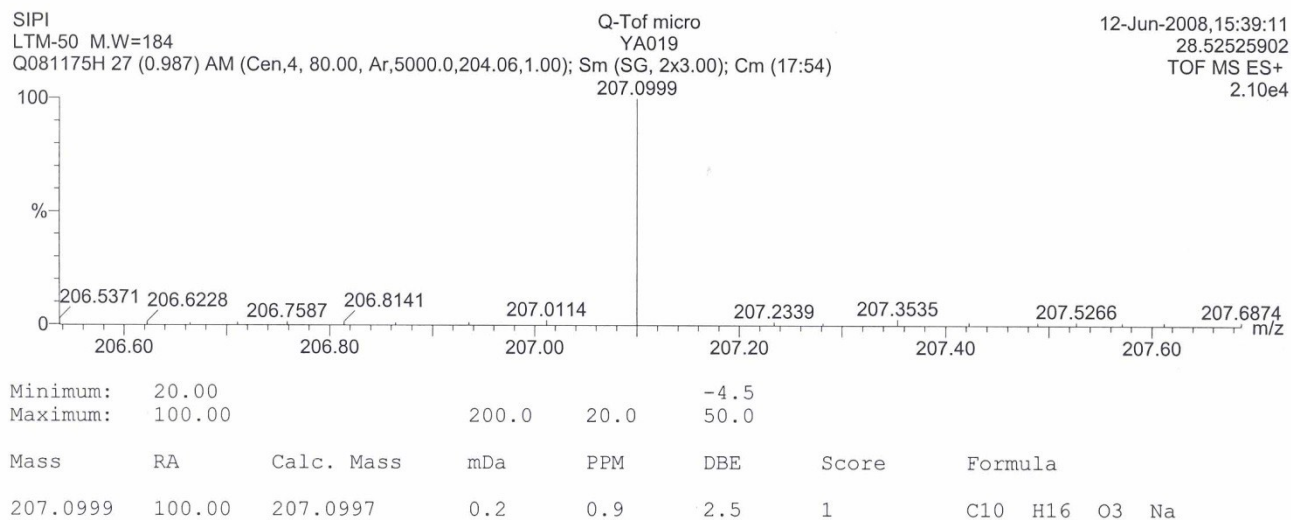

Figure S2. The <sup>1</sup>H NMR spectrum of secoarguterin (500 MHz, CDCl<sub>3</sub>)

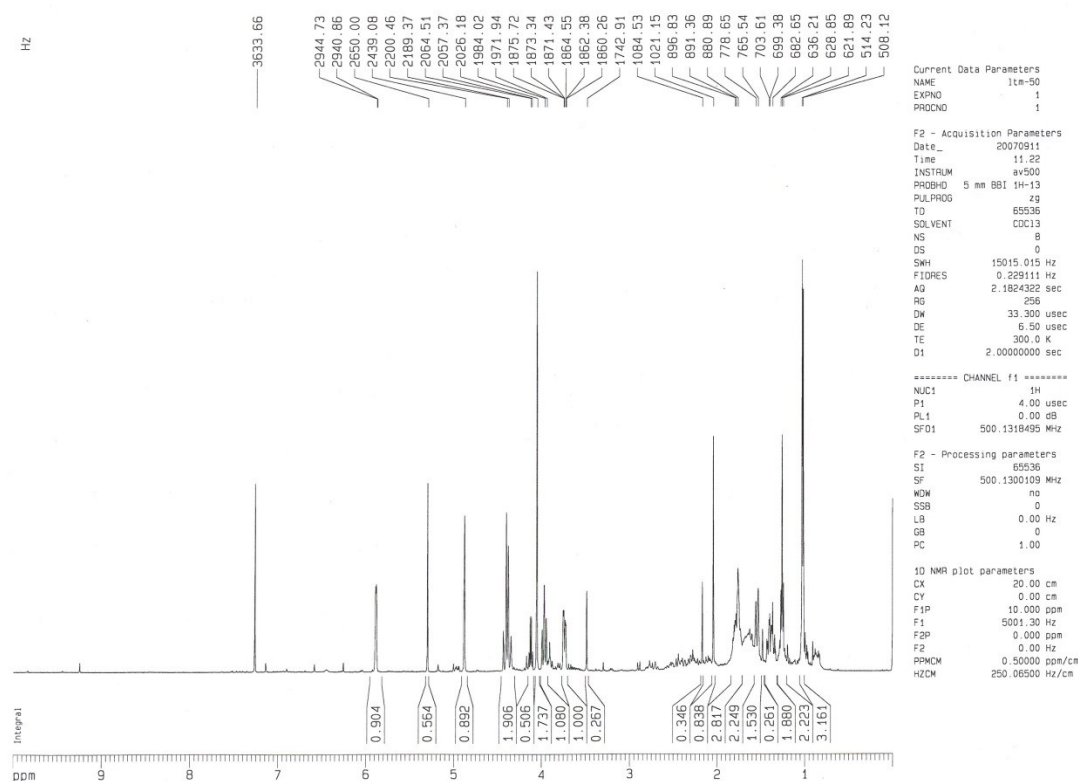

Figure S3. The  $^{13}\text{C}$  NMR spectrum of secoarguterin (125MHz,  $\text{CDCl}_3$ )

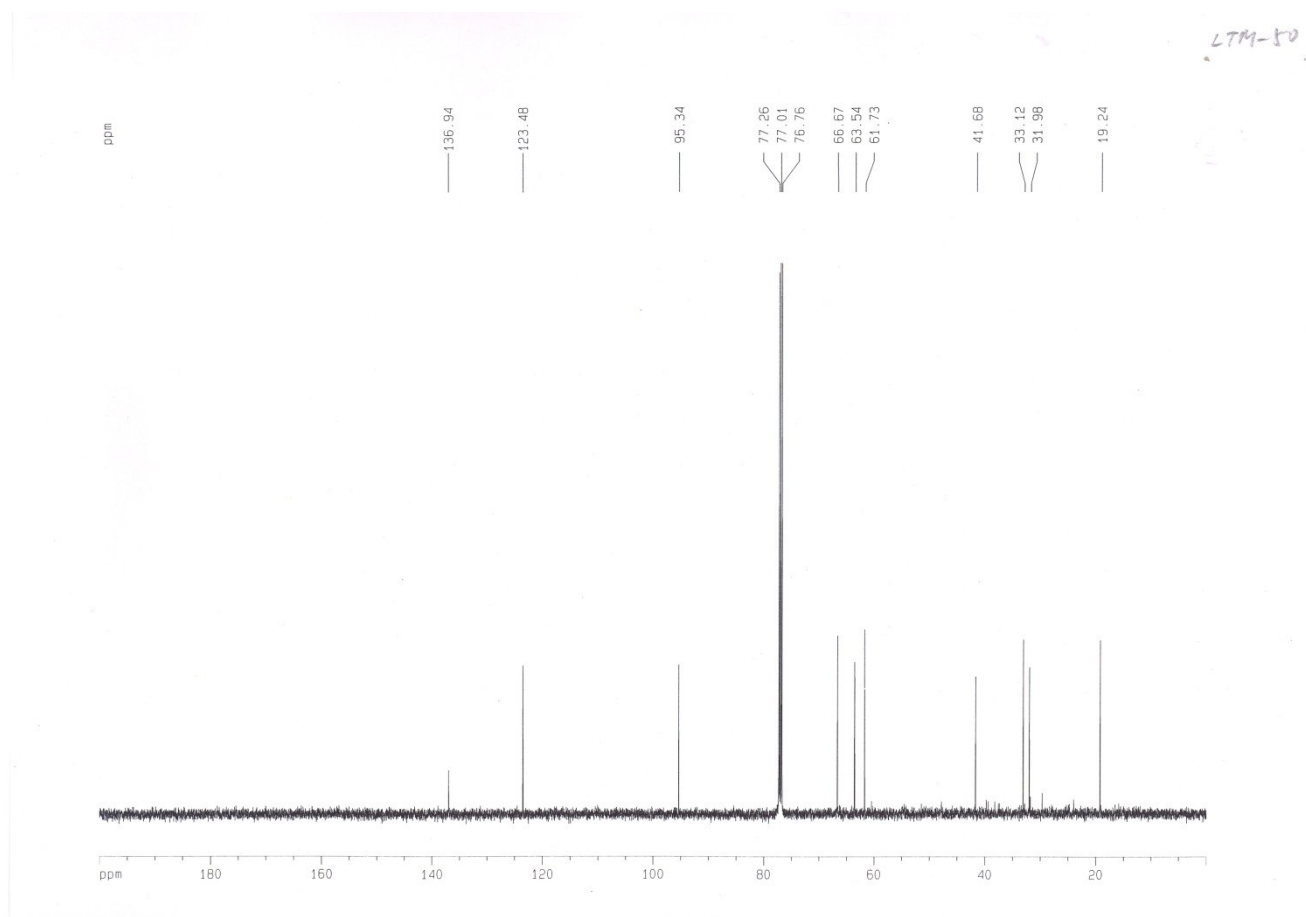

Figure S4. DEPT NMR spectrum of secoarguterin (125MHz,  $\text{CDCl}_3$ )

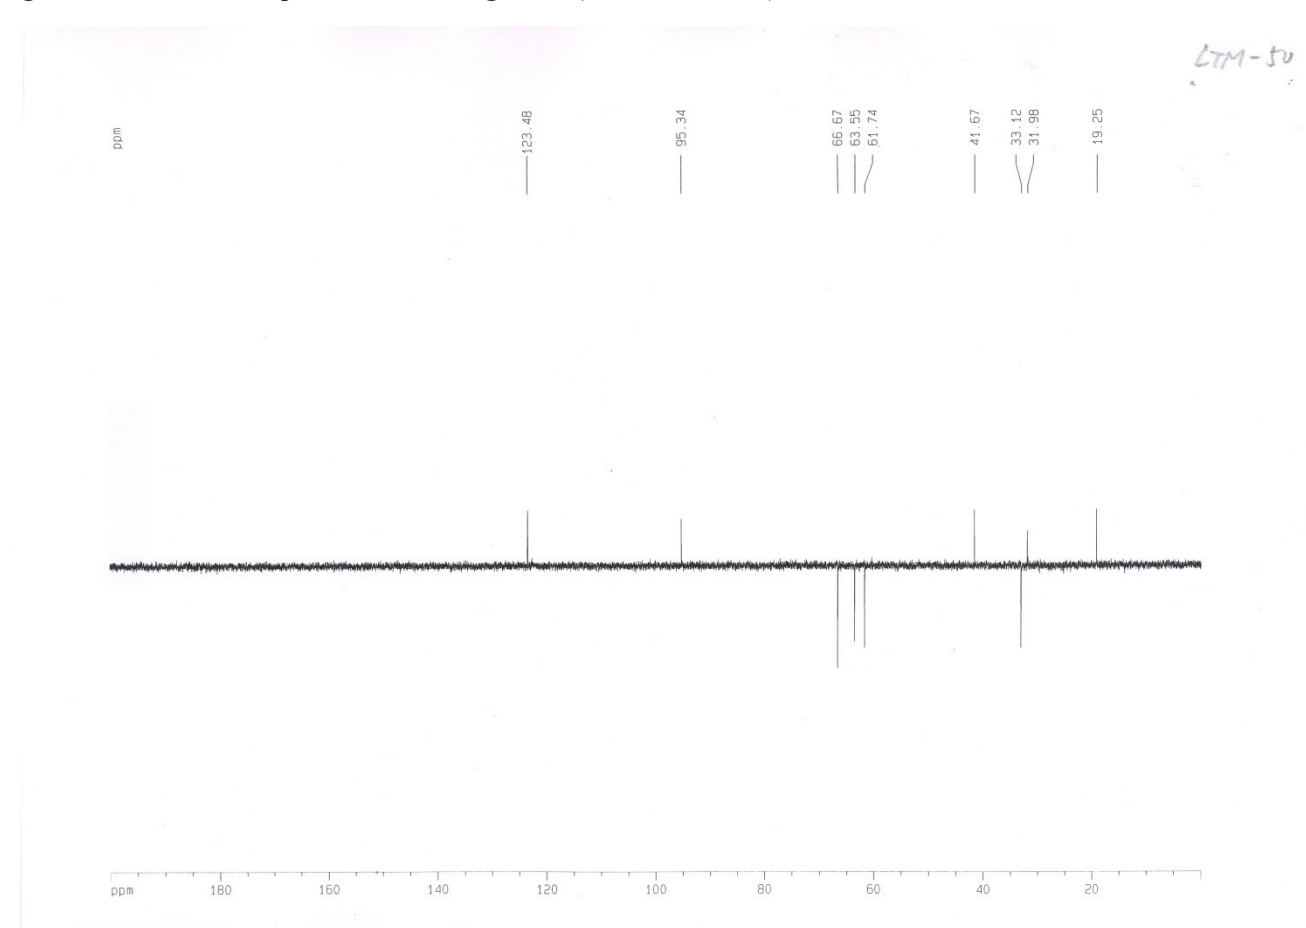

Figure S5. The  $^1\text{H}$ - $^1\text{H}$  COSY NMR spectrum of secoarguterin (500 MHz,  $\text{CDCl}_3$ )

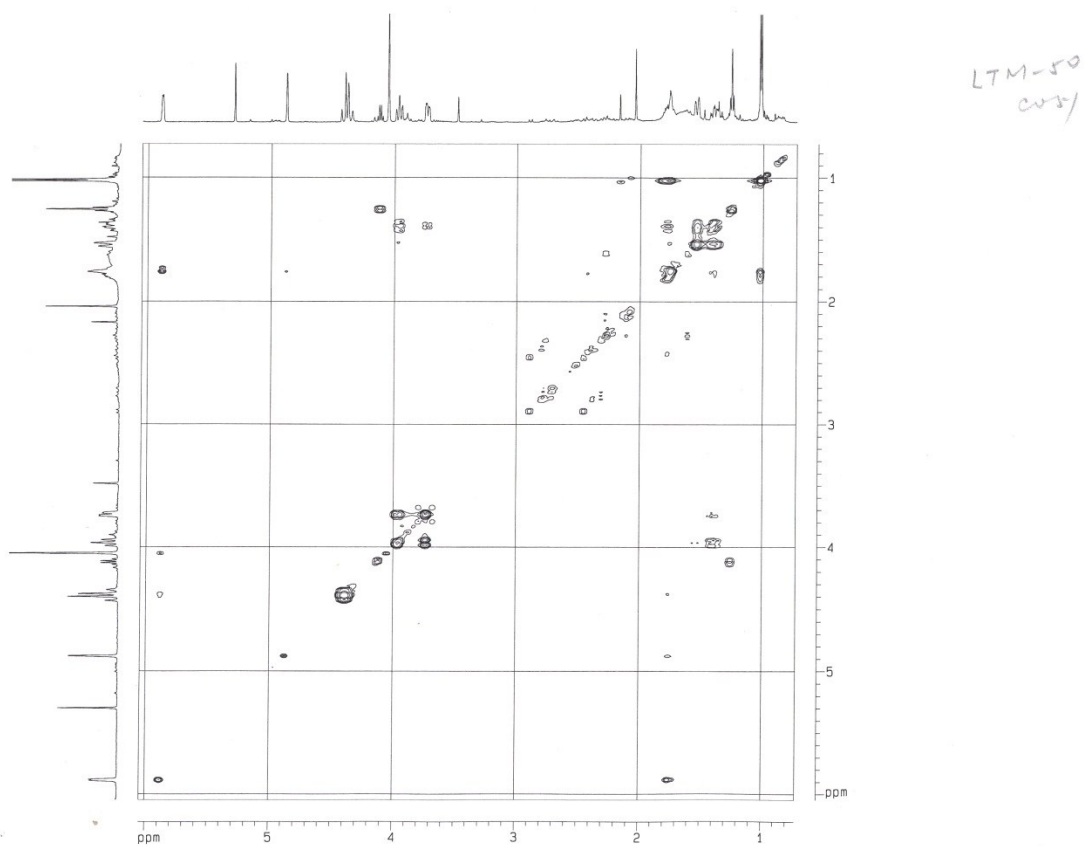

Figure S6. The HSQC spectrum of secoarguterin (500 MHz,  $\text{CDCl}_3$ )

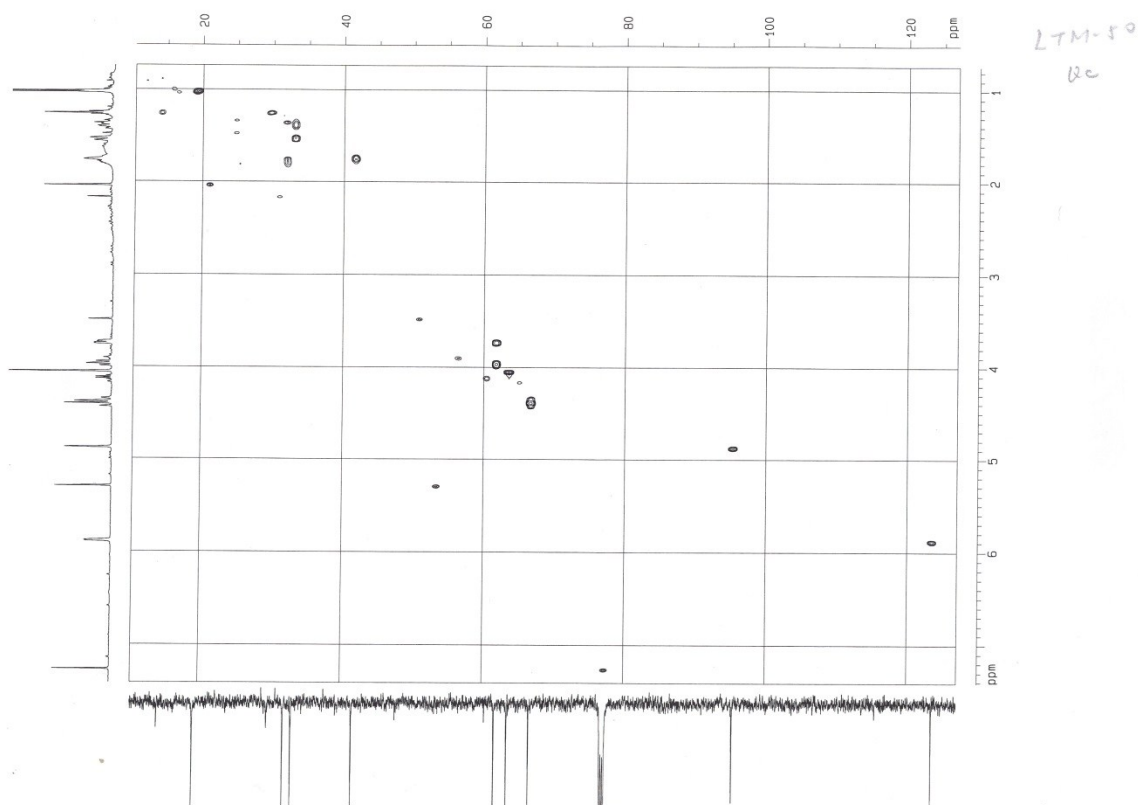

Figure S7. The HMBC spectrum of secoarguterin (500 MHz, CDCl<sub>3</sub>)

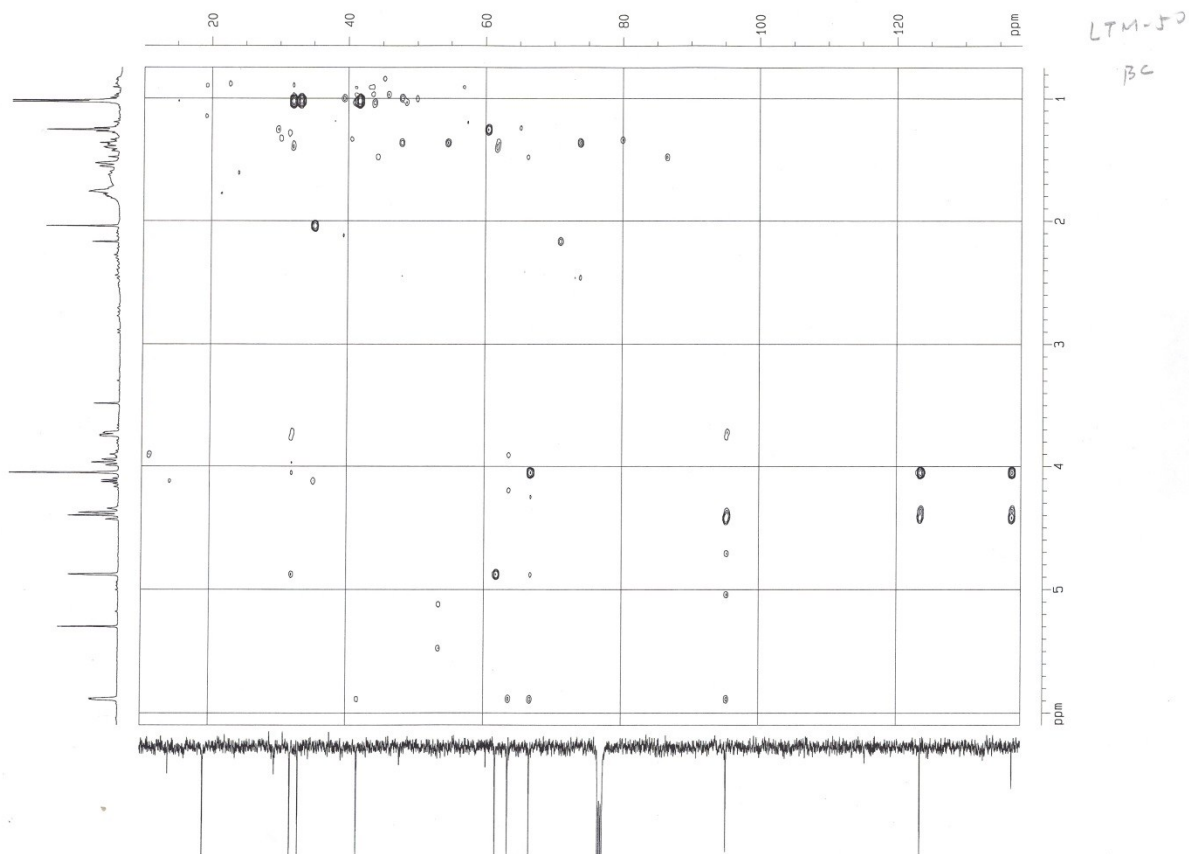

Figure S8. The NOESY spectrum of secoarguterin (500 MHz, CDCl<sub>3</sub>)

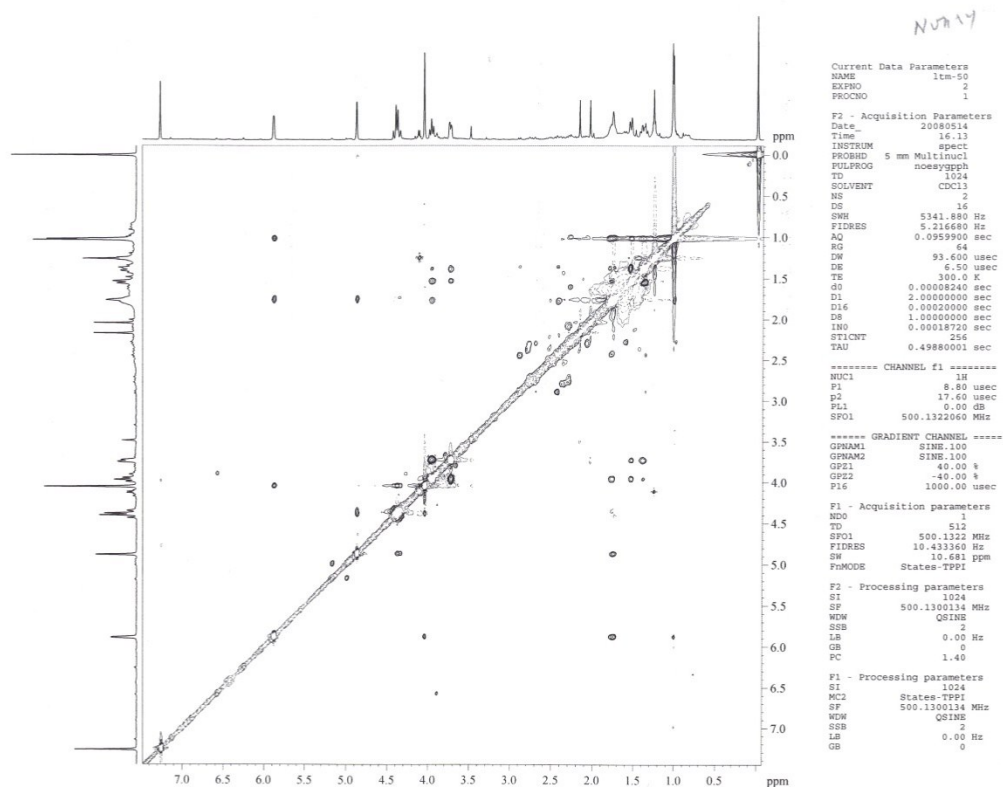

## VI. Synthesis Experimental Procedures and Spectroscopic Data of Compounds

### Compound 4

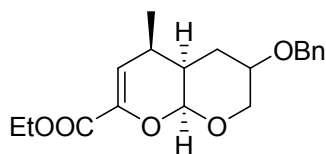

1.5 ml of a 0.02M solution of  $[\text{Cu}((S,S)\text{-t-Bu-box})](\text{SbF}_6)_2$  was treated at  $-40^\circ\text{C}$  with unsaturated ester **2** (6.5g, 45mmol) and **3** (26.7g, 140.5mmol). After the reaction was completed (TLC), the organic solvent was removed under reduced pressure. The residue was purified by column chromatography (petroleum ether/ethyl acetate = 6:1) to afford compound **4** (15.6g, yield: 75%) as a colorless oil.  $[\alpha]_D^{20}$  -38 (c 0.17,  $\text{CHCl}_3$ );  $^1\text{H}$  NMR (500 MHz,  $\text{CDCl}_3$ )  $\delta$ : 7.41 – 7.32 (m, 4H), 7.28 (dt,  $J$  = 7.6, 3.4 Hz, 1H), 5.73 (dd,  $J$  = 2.1, 1.4 Hz, 1H), 5.33 (s, 1H), 4.64 (d,  $J$  = 12.2 Hz, 1H), 4.54 (d,  $J$  = 12.2 Hz, 1H), 4.25 (qd,  $J$  = 7.1, 0.8 Hz, 2H), 4.04 (dd,  $J$  = 12.5, 1.4 Hz, 1H), 3.95 – 3.87 (m, 1H), 3.60 (s, 1H), 2.85 – 2.74 (m, 1H), 2.42 (d,  $J$  = 13.2 Hz, 1H), 1.84 (d,  $J$  = 10.7 Hz, 1H), 1.45 (td,  $J$  = 13.6, 2.9 Hz, 1H), 1.31 (t,  $J$  = 7.1 Hz, 3H), 1.00 (d,  $J$  = 7.4 Hz, 3H).  $^{13}\text{C}$  NMR (125MHz,  $\text{CDCl}_3$ )  $\delta$ : 128.36, 127.53, 114.01, 97.65, 70.64, 62.28, 61.11, 30.50, 29.69, 22.10, 15.51, 14.18. HR-ESI-MS calcd for  $\text{C}_{19}\text{H}_{24}\text{NaO}_5$   $[\text{M}+\text{Na}]^+$  355.1515, found 355.1516.

### Compound 5

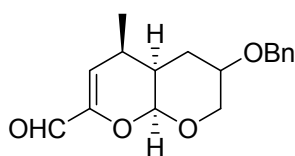

To a solution of **4** (15.6g, 46.9mmol) in anhydrous  $\text{CH}_2\text{Cl}_2$  (250mL) was added dropwise DIBAL-H (46.9mL, 1M in THF) at  $-78^\circ\text{C}$ , then the solution was stirred at the same temperature for 2h. After the reaction was completed (TLC), a saturated aqueous solution of  $\text{NH}_4\text{Cl}$  (20 mL) was added. The mixture was extracted with ethyl acetate ( $3 \times 25$  mL). The combined organic layers were washed with brine (25 mL), and then dried over anhydrous  $\text{Na}_2\text{SO}_4$ . The solvent was removed under vacuum, and the residue was purified by flash column chromatography on silica gel (hexane/ethyl acetate = 6:1 to 4:1) to give colorless oil product **5** (13.6 g, 65%).  $[\alpha]_D^{20}$  -45 (c 0.19,  $\text{CHCl}_3$ ).  $^1\text{H}$  NMR (500 MHz,  $\text{CDCl}_3$ )  $\delta$  9.15 (d,  $J$  = 2.9 Hz, 1H), 7.40 – 7.28 (m, 6H), 5.54 (dd,  $J$  = 2.4, 1.4 Hz, 1H), 5.35 (s, 1H), 4.65 (d,  $J$  = 12.1 Hz, 1H),

4.53 (d,  $J = 12.1$  Hz, 1H), 4.03 (dd,  $J = 12.6, 1.3$  Hz, 1H), 3.96 – 3.86 (m, 1H), 3.60 (s, 1H), 3.00 – 2.85 (m, 1H), 2.48 (s, 1H), 1.86 (dd,  $J = 13.8, 3.0$  Hz, 1H), 1.40 (dt,  $J = 13.6, 2.6$  Hz, 2H), 1.11 (d,  $J = 7.4$  Hz, 1H), 1.06 (d,  $J = 7.5$  Hz, 2H).  $^{13}\text{C}$  NMR (125MHz,  $\text{CDCl}_3$ )  $\delta$ : 186.09, 128.38, 127.56, 125.13, 97.67, 70.80, 70.38, 62.15, 30.82, 30.37, 22.32, 15.24. HR-ESI-MS calcd for  $\text{C}_{17}\text{H}_{20}\text{NaO}_4$   $[\text{M}+\text{Na}]^+ 311.1253$ , found 311.1252.

## Compound 6

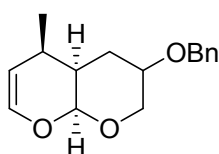

To a toluene solution (250mL) of the compound **5** (13.6g, 34.7mmol) was added  $\text{RhCl}(\text{PPh}_3)_3$  (32.1g, 34.7mmol), and the mixture was heated to reflux for 5h. The colour of the solution turned from red to yellow. The solution was concentrated and chromatographed on a silica column to afford compound **6** (9.7g, 75%) as a colorless oil.  $^1\text{H}$  NMR (500 MHz,  $\text{CDCl}_3$ )  $\delta$  7.44 – 7.28 (m, 5H), 6.25 (dd,  $J = 5.5, 3.1$  Hz, 1H), 5.26 (s, 1H), 4.70 – 4.48 (m, 3H), 4.34 (t,  $J = 7.5$  Hz, 1H), 3.95 (d,  $J = 12.3$  Hz, 1H), 3.83 (dd,  $J = 20.9, 12.5$  Hz, 1H), 3.58 (d,  $J = 9.2$  Hz, 1H), 2.75 – 2.62 (m, 1H), 2.48 – 2.29 (m, 1H), 1.81 (ddd,  $J = 31.5, 26.9, 13.7$  Hz, 2H), 1.57 (td,  $J = 13.6, 2.4$  Hz, 1H), 1.07 (d,  $J = 7.1$  Hz, 1H), 1.00 – 0.83 (m, 3H).  $^{13}\text{C}$  NMR (125MHz,  $\text{CDCl}_3$ )  $\delta$  138.54, 134.44, 132.80, 128.33, 127.51, 99.75, 98.22, 94.94, 92.44, 70.98, 69.60, 62.16, 38.32, 36.15, 33.13, 29.64, 26.27, 20.11, 17.60. HR-ESI-MS calcd for  $\text{C}_{16}\text{H}_{20}\text{NaO}_3$   $[\text{M}+\text{Na}]^+ 283.1304$ , found 283.1305.

## Compound 7

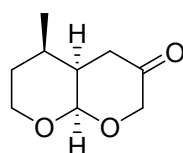

The compound **6** (9.7g, 37.3mmol) and 10% Pd/C (1g) in  $\text{CH}_3\text{OH}$  (5 mL) was stirred at room temperature under a hydrogen atmosphere for 24h, filtered through a pad of celite, and concentrated. To a cooled ( $-78^\circ\text{C}$ ) solution of oxalyl chloride (6.5mL, 74.6mmol) in  $\text{CH}_2\text{Cl}_2$  (200mL) was added dimethyl sulfoxide

(10.6 mL, 149.2mmol) followed by above crude product. The reaction mixture was allowed to stir for 1h at  $-78^{\circ}\text{C}$ , then triethylamine (76.0mL, 547mmol) was added. The solution was allowed to warm to  $23^{\circ}\text{C}$  for 3h, and  $\text{H}_2\text{O}$  (100mL) was added. The aqueous layer was extracted with  $\text{CH}_2\text{Cl}_2$  (4 $\times$ 60mL), and the combined organic layers were washed with  $\text{H}_2\text{O}$  (3 $\times$ 30mL), and brine (50mL), dried over  $\text{MgSO}_4$ , and concentrated in vacuum. The resulting oil was purified by flash chromatography (hexane/ethyl acetate=5:1) to afford compound **7** (1.5g, 59%).  $^1\text{H}$  NMR (500 MHz,  $\text{CDCl}_3$ )  $\delta$ : 4.78 (d,  $J$  = 2.3 Hz, 1H), 4.29 (dd,  $J$  = 16.1, 0.5 Hz, 1H), 4.11 (ddd,  $J$  = 11.8, 5.0, 1.3 Hz, 1H), 3.95 (dd,  $J$  = 16.1, 1.7 Hz, 1H), 3.67 – 3.54 (m, 1H), 2.49 (dd,  $J$  = 16.5, 12.5 Hz, 1H), 2.34 (dd,  $J$  = 16.4, 5.5 Hz, 1H), 2.27 – 2.19 (m, 1H), 2.07 – 1.95 (m, 1H), 1.48 (dtd,  $J$  = 17.4, 12.4, 5.0 Hz, 1H), 1.39 – 1.29 (m, 1H), 0.90 (dd,  $J$  = 6.8, 2.9 Hz, 3H).  $^{13}\text{C}$  NMR (125 MHz,  $\text{CDCl}_3$ )  $\delta$ : 207.12, 97.06, 68.20, 66.52, 39.74, 33.47, 31.65, 27.25, 17.45. HR-ESI-MS calcd for  $\text{C}_9\text{H}_{14}\text{NaO}_3$   $[\text{M}+\text{Na}]^+$  193.0835, found 193.0835.

## Compound **8**

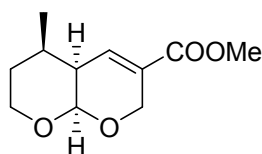

To a stirring solution of compound **7** (100mg, 0.588mmol) in 5 mL of THF, cooled to  $-78^{\circ}\text{C}$ , was added dropwise 2.5 mL (1.76mmol) of a 0.7 M solution of KHMDS in THF. After 1h, a solution of 252mg (0.706mmol) of N-phenyltrifluoromethanesulfonimide in 4.5 mL of THF was added slowly. The solution was stirred at  $-78^{\circ}\text{C}$  for 1h. Saturated aqueous  $\text{NH}_4\text{Cl}$  was added and the mixture was extracted with 10 mL of ether. The organic layer was washed with two 10-mL portions of water and then with 10 mL of saturated brine, dried, filtered, and concentrated to give a yellow-orange oil.

A solution of a mixture of above crude product (152mg, 0.503mmol), triethylamine (16.9mg, 0.167mmol), methanol (1.2ml), palladium(II) acetate (22.3mg, 0.1mmol), and triphenylphosphine (52.4mg, 0.2mmol) in 3mL of DMF was purged with carbon monoxide for 5 min, and then allowed to stir at room temperature under a balloon of carbon monoxide for 2h. The mixture was poured into 30 mL of ether and washed with two 30mL portions of water, 30 mL of saturated brine, dried, filtered and concentrated to give a brown oil. The crude product was purified by flash chromatography (hexane/ethyl acetate = 5:1) to give compound **8** (13.2mg, 16%) as a colorless oil.  $^1\text{H}$  NMR (500 MHz,  $\text{CDCl}_3$ )  $\delta$  7.07 (ddd,  $J$  = 15.9, 8.8, 7.1 Hz, 1H), 4.86 (d,  $J$  = 2.7 Hz, 1H), 4.63 (d,  $J$  = 16.6 Hz, 1H), 4.46 (dt,  $J$  = 16.6, 2.5 Hz, 1H), 3.96 (td,  $J$

= 11.9, 2.4 Hz, 1H), 3.80 – 3.69 (m, 4H), 1.96 – 1.77 (m, 2H), 1.60 – 1.54 (m, 1H), 1.48 – 1.36 (m, 1H), 1.08 (t,  $J = 7.3$  Hz, 3H).  $^{13}\text{C}$  NMR (125MHz,  $\text{CDCl}_3$ )  $\delta$  165.12, 139.50, 129.21, 94.42, 65.20, 61.55, 51.66, 42.03, 32.96, 31.64, 30.86, 19.29. HR-ESI-MS calcd for  $\text{C}_{11}\text{H}_{16}\text{NaO}_4$   $[\text{M}+\text{Na}]^+ 235.0940$ , found 235.0941.

### Compound1

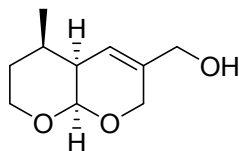

To a solution of **8** (13.2mg, 0.062mmol) in anhydrous  $\text{CH}_2\text{Cl}_2$  (5mL) was added dropwise DIBAL-H (0.18mL, 1M/L in THF) at room temperature, then the solution was stirred at the same temperature for 2h. After the reaction was complete (TLC). A saturated aqueous solution of  $\text{NH}_4\text{Cl}$  (20 mL) was added. The mixture was extracted with ethyl acetate ( $3 \times 25$  mL). The combined organic layers were washed with brine (25mL), and then dried over anhydrous  $\text{Na}_2\text{SO}_4$ . The solvent was removed under vacuum, and the residue was purified by flash column chromatography on silica gel (hexane/ethyl acetate = 2:1) to give colorless oil product **1** (6.1mg, 57%).  $[\alpha]_D^{20} -105$  (c 0.4,  $\text{CHCl}_3$ ).  $^1\text{H}$  NMR (500 MHz,  $\text{CDCl}_3$ )  $\delta$  5.87 (d,  $J = 2.7, 11.4$  Hz, 1H), 4.87 (t,  $J = 6.3$  Hz, 1H), 4.47 – 4.32 (m, 2H), 4.06 (d,  $J = 12.0$  Hz, 2H), 4.01 – 3.91 (m, 1H), 3.78 – 3.69 (m, 1H), 1.85 – 1.72 (m, 2H), 1.56 – 1.50 (m, 1H), 1.45 – 1.34 (m, 1H), 1.02 (t,  $J = 5.6$  Hz, 3H).  $^{13}\text{C}$  NMR (125MHz,  $\text{CDCl}_3$ )  $\delta$  136.81, 123.50, 95.30, 66.66, 63.56, 61.73, 41.57, 33.07, 31.92, 19.25. HR-ESI-MS calcd for  $\text{C}_{10}\text{H}_{16}\text{NaO}_3$   $[\text{M}+\text{Na}]^+ 207.0997$ , found 207.0992

### Compound9

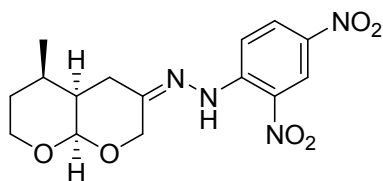

To a  $\text{CH}_3\text{CH}_2\text{OH}$  solution (10 mL) of the compound **7** (20 mg, 0.118 mmol) was added 2,4-dinitrophenylhydrazine (23.3 mg, 0.118 mmol), and the mixture was heated to reflux for 2h. When the solution was cooled, crystals appeared. Product was filtered (33 mg, 80%).  $[\alpha]_D^{20} -44$  (c 0.2,  $\text{CHCl}_3$ ).  $^1\text{H}$  NMR (500 MHz,  $\text{CDCl}_3$ )  $\delta$  11.19 (s, 1H), 9.13 (dd,  $J = 5.3, 2.6$  Hz, 1H), 8.40 – 8.21 (m, 1H), 7.96 (d,  $J =$

9.6 Hz, 1H), 4.82 (d,  $J = 2.1$  Hz, 1H), 4.60 (d,  $J = 13.8$  Hz, 1H), 4.27 (d,  $J = 13.8$  Hz, 1H), 4.21 – 4.08 (m, 1H), 3.61 (td,  $J = 12.2, 2.7$  Hz, 1H), 2.65 (dd,  $J = 15.2, 5.2$  Hz, 1H), 2.42 (dd,  $J = 15.0, 12.5$  Hz, 1H), 2.10 – 1.99 (m, 2H), 1.40 (d,  $J = 14.3$  Hz, 1H), 1.05 (d,  $J = 6.8$  Hz, 3H).  $^{13}\text{C}$  NMR (125MHz,  $\text{CDCl}_3$ )  $\delta$  154.02, 145.20, 130.14, 123.39, 116.35, 98.04, 66.42, 64.25, 39.04, 31.89, 27.57, 19.69, 17.68. HR-ESI-MS calcd for  $\text{C}_{15}\text{H}_{18}\text{N}_4\text{O}_6$   $[\text{M}+\text{H}]^+$  351.1299, found 351.1299.

## X. Spectra of compounds

Figure S9. The  $^1\text{H}$  NMR spectrum of compound 4 (500 MHz,  $\text{CDCl}_3$ )

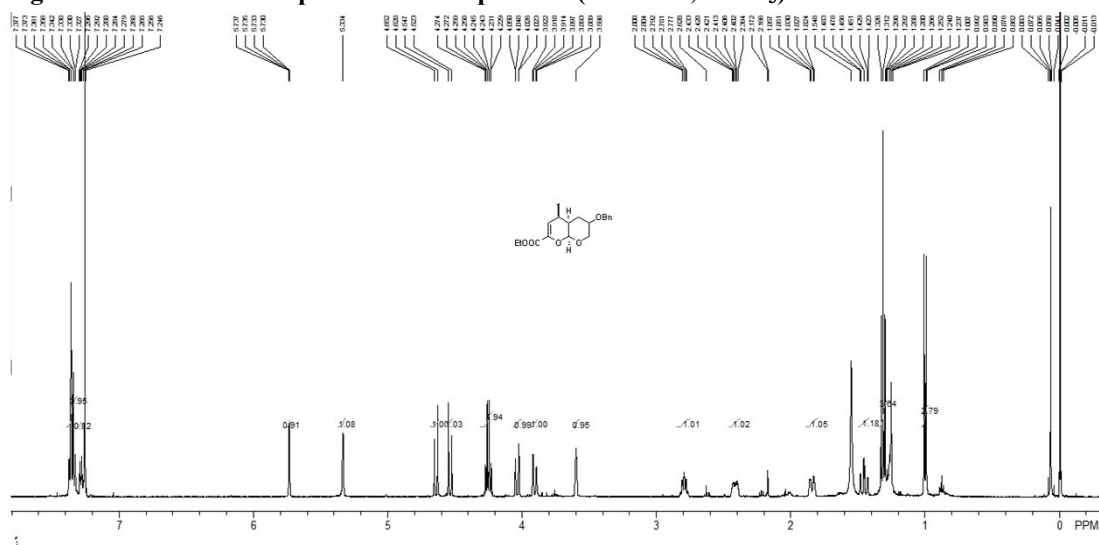

Figure S10. The  $^{13}\text{C}$  NMR spectrum of compound 4 (125MHz,  $\text{CDCl}_3$ )

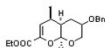

Chemical structure of 6-benzyl-2,3-dihydro-2H-pyran-3-one:

O=C1C=CC(=O)OC(C1)Cc2ccccc2

<sup>1</sup>H NMR spectrum (CDCl<sub>3</sub>) showing peaks and integrations:

| Chemical Shift (ppm)                                                                                                                                                                                                                                                                                                                                                                                                                                                                                                                                                                                                                                                                                                                                                                                                                                                                                                                                                                                                                                                                                                                                                                                                                                                                                                                                                                                                                                                                                                                                                                                                                                                                                                                                                                                                                                                                                                                                                                                                                                                                                                                                                                                                                                                                                                                                                                                                                                                                                                                                                                                                                                                                                                                                                                                                                                                                                                                                                                                                                                                                                                                                                                                                                                                                                                                                                                                                                                                                                                                                                                                                                                                                                                                                                                                                                                                                                                                                                                                                                      | Integration |
|-------------------------------------------------------------------------------------------------------------------------------------------------------------------------------------------------------------------------------------------------------------------------------------------------------------------------------------------------------------------------------------------------------------------------------------------------------------------------------------------------------------------------------------------------------------------------------------------------------------------------------------------------------------------------------------------------------------------------------------------------------------------------------------------------------------------------------------------------------------------------------------------------------------------------------------------------------------------------------------------------------------------------------------------------------------------------------------------------------------------------------------------------------------------------------------------------------------------------------------------------------------------------------------------------------------------------------------------------------------------------------------------------------------------------------------------------------------------------------------------------------------------------------------------------------------------------------------------------------------------------------------------------------------------------------------------------------------------------------------------------------------------------------------------------------------------------------------------------------------------------------------------------------------------------------------------------------------------------------------------------------------------------------------------------------------------------------------------------------------------------------------------------------------------------------------------------------------------------------------------------------------------------------------------------------------------------------------------------------------------------------------------------------------------------------------------------------------------------------------------------------------------------------------------------------------------------------------------------------------------------------------------------------------------------------------------------------------------------------------------------------------------------------------------------------------------------------------------------------------------------------------------------------------------------------------------------------------------------------------------------------------------------------------------------------------------------------------------------------------------------------------------------------------------------------------------------------------------------------------------------------------------------------------------------------------------------------------------------------------------------------------------------------------------------------------------------------------------------------------------------------------------------------------------------------------------------------------------------------------------------------------------------------------------------------------------------------------------------------------------------------------------------------------------------------------------------------------------------------------------------------------------------------------------------------------------------------------------------------------------------------------------------------------------|-------------|
| 9.87, 9.85                                                                                                                                                                                                                                                                                                                                                                                                                                                                                                                                                                                                                                                                                                                                                                                                                                                                                                                                                                                                                                                                                                                                                                                                                                                                                                                                                                                                                                                                                                                                                                                                                                                                                                                                                                                                                                                                                                                                                                                                                                                                                                                                                                                                                                                                                                                                                                                                                                                                                                                                                                                                                                                                                                                                                                                                                                                                                                                                                                                                                                                                                                                                                                                                                                                                                                                                                                                                                                                                                                                                                                                                                                                                                                                                                                                                                                                                                                                                                                                                                                | 1.06        |
| 7.37, 7.36, 7.35, 7.34, 7.33, 7.32, 7.31, 7.30, 7.29, 7.28, 7.27, 7.26, 7.25, 7.24, 7.23, 7.22, 7.21, 7.20, 7.19, 7.18, 7.17, 7.16, 7.15, 7.14, 7.13, 7.12, 7.11, 7.10, 7.09, 7.08, 7.07, 7.06, 7.05, 7.04, 7.03, 7.02, 7.01, 7.00, 6.99, 6.98, 6.97, 6.96, 6.95, 6.94, 6.93, 6.92, 6.91, 6.90, 6.89, 6.88, 6.87, 6.86, 6.85, 6.84, 6.83, 6.82, 6.81, 6.80, 6.79, 6.78, 6.77, 6.76, 6.75, 6.74, 6.73, 6.72, 6.71, 6.70, 6.69, 6.68, 6.67, 6.66, 6.65, 6.64, 6.63, 6.62, 6.61, 6.60, 6.59, 6.58, 6.57, 6.56, 6.55, 6.54, 6.53, 6.52, 6.51, 6.50, 6.49, 6.48, 6.47, 6.46, 6.45, 6.44, 6.43, 6.42, 6.41, 6.40, 6.39, 6.38, 6.37, 6.36, 6.35, 6.34, 6.33, 6.32, 6.31, 6.30, 6.29, 6.28, 6.27, 6.26, 6.25, 6.24, 6.23, 6.22, 6.21, 6.20, 6.19, 6.18, 6.17, 6.16, 6.15, 6.14, 6.13, 6.12, 6.11, 6.10, 6.09, 6.08, 6.07, 6.06, 6.05, 6.04, 6.03, 6.02, 6.01, 6.00, 5.99, 5.98, 5.97, 5.96, 5.95, 5.94, 5.93, 5.92, 5.91, 5.90, 5.89, 5.88, 5.87, 5.86, 5.85, 5.84, 5.83, 5.82, 5.81, 5.80, 5.79, 5.78, 5.77, 5.76, 5.75, 5.74, 5.73, 5.72, 5.71, 5.70, 5.69, 5.68, 5.67, 5.66, 5.65, 5.64, 5.63, 5.62, 5.61, 5.60, 5.59, 5.58, 5.57, 5.56, 5.55, 5.54, 5.53, 5.52, 5.51, 5.50, 5.49, 5.48, 5.47, 5.46, 5.45, 5.44, 5.43, 5.42, 5.41, 5.40, 5.39, 5.38, 5.37, 5.36, 5.35, 5.34, 5.33, 5.32, 5.31, 5.30, 5.29, 5.28, 5.27, 5.26, 5.25, 5.24, 5.23, 5.22, 5.21, 5.20, 5.19, 5.18, 5.17, 5.16, 5.15, 5.14, 5.13, 5.12, 5.11, 5.10, 5.09, 5.08, 5.07, 5.06, 5.05, 5.04, 5.03, 5.02, 5.01, 5.00, 4.99, 4.98, 4.97, 4.96, 4.95, 4.94, 4.93, 4.92, 4.91, 4.90, 4.89, 4.88, 4.87, 4.86, 4.85, 4.84, 4.83, 4.82, 4.81, 4.80, 4.79, 4.78, 4.77, 4.76, 4.75, 4.74, 4.73, 4.72, 4.71, 4.70, 4.69, 4.68, 4.67, 4.66, 4.65, 4.64, 4.63, 4.62, 4.61, 4.60, 4.59, 4.58, 4.57, 4.56, 4.55, 4.54, 4.53, 4.52, 4.51, 4.50, 4.49, 4.48, 4.47, 4.46, 4.45, 4.44, 4.43, 4.42, 4.41, 4.40, 4.39, 4.38, 4.37, 4.36, 4.35, 4.34, 4.33, 4.32, 4.31, 4.30, 4.29, 4.28, 4.27, 4.26, 4.25, 4.24, 4.23, 4.22, 4.21, 4.20, 4.19, 4.18, 4.17, 4.16, 4.15, 4.14, 4.13, 4.12, 4.11, 4.10, 4.09, 4.08, 4.07, 4.06, 4.05, 4.04, 4.03, 4.02, 4.01, 4.00, 3.99, 3.98, 3.97, 3.96, 3.95, 3.94, 3.93, 3.92, 3.91, 3.90, 3.89, 3.88, 3.87, 3.86, 3.85, 3.84, 3.83, 3.82, 3.81, 3.80, 3.79, 3.78, 3.77, 3.76, 3.75, 3.74, 3.73, 3.72, 3.71, 3.70, 3.69, 3.68, 3.67, 3.66, 3.65, 3.64, 3.63, 3.62, 3.61, 3.60, 3.59, 3.58, 3.57, 3.56, 3.55, 3.54, 3.53, 3.52, 3.51, 3.50, 3.49, 3.48, 3.47, 3.46, 3.45, 3.44, 3.43, 3.42, 3.41, 3.40, 3.39, 3.38, 3.37, 3.36, 3.35, 3.34, 3.33, 3.32, 3.31, 3.30, 3.29, 3.28, 3.27, 3.26, 3.25, 3.24, 3.23, 3.22, 3.21, 3.20, 3.19, 3.18, 3.17, 3.16, 3.15, 3.14, 3.13, 3.12, 3.11, 3.10, 3.09, 3.08, 3.07, 3.06, 3.05, 3.04, 3.03, 3.02, 3.01, 3.00, 2.99, 2.98, 2.97, 2.96, 2.95, 2.94, 2.93, 2.92, 2.91, 2.90, 2.89, 2.88, 2.87, 2.86, 2.85, 2.84, 2.83, 2.82, 2.81, 2.80, 2.79, 2.78, 2.77, 2.76, 2.75, 2.74, 2.73, 2.72, 2.71, 2.70, 2.69, 2.68, 2.67, 2.66, 2.65, 2.64, 2.63, 2.62, 2.61, 2.60, 2.59, 2.58, 2.57, 2.56, 2.55, 2.54, 2.53, 2.52, 2.51, 2.50, 2.49, 2.48, 2.47, 2.46, 2.45, 2.44, 2.43, 2.42, 2.41, 2.40, 2.39, 2.38, 2.37, 2.36, 2.35, 2.34, 2.33, 2.32, 2.31, 2.30, 2.29, 2.28, 2.27, 2.26, 2.25, 2.24, 2.23, 2.22, 2.21, 2.20, 2.19, 2.18, 2.17, 2.16, 2.15, 2.14, 2.13, 2.12, 2.11, 2.10, 2.09, 2.08, 2.07, 2.06, 2.05, 2.04, 2.03, 2.02, 2.01, 2.00, 1.99, 1.98, 1.97, 1.96, 1.95, 1.94, 1.93, 1.92, 1.91, 1.90, 1.89, 1.88, 1.87, 1.86, 1.85, 1.84, 1.83, 1.82, 1.81, 1.80, 1.79, 1.78, 1.77, 1.76, 1.75, 1.74, 1.73, 1.72, 1.71, 1.70, 1.69, 1.68, 1.67, 1.66, 1.65, 1.64, 1.63, 1.62, 1.61, 1.60, 1.59, 1.58, 1.57, 1.56, 1.55, 1.54, 1.53, 1.52, 1.51, 1.50, 1.49, 1.48, 1.47, 1.46, 1.45, 1.44, 1.43, 1.42, 1.41, 1.40, 1.39, 1.38, 1.37, 1.36, 1.35, 1.34, 1.33, 1.32, 1.31, 1.30, 1.29, 1.28, 1.27, 1.26, 1.25, 1.24, 1.23, 1.22, 1.21, 1.20, 1.19, 1.18, 1.17, 1.16, 1.15, 1.14, 1.13, 1.12, 1.11, 1.10, 1.09, 1.08, 1.07, 1.06, 1.05, 1.04, 1.03, 1.02, 1.01, 1.00, 0.99, 0.98, 0.97, 0.96, 0.95, 0.94, 0.93, 0.92, 0.91, |             |

Chemical structure: C[C@H]1C[C@@H](COc2ccccc2)[C@H](O)C1=O

<sup>1</sup>H NMR spectrum (CDCl<sub>3</sub>) showing peaks at:

- 10.0 ppm (s, 1H, OH)
- 7.2 ppm (d, 4H, aromatic)
- 6.1 ppm (s, 1H, CH=O)
- 5.1 ppm (d, 1H, CH-OH)
- 4.1 ppm (d, 2H, CH<sub>2</sub>-OBn)
- 3.1 ppm (d, 3H, CH<sub>3</sub>)
- 2.1 ppm (d, 2H, CH<sub>2</sub>-OBn)

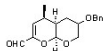

Figure S13. The  $^1\text{H}$  NMR spectrum of compound 6 (500 MHz,  $\text{CDCl}_3$ )

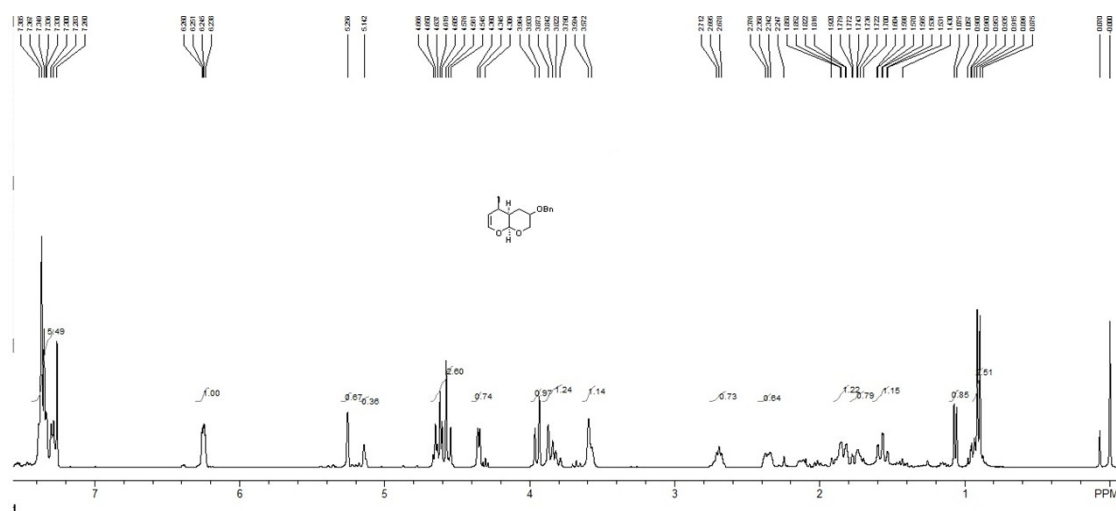

Figure S14. The  $^{13}\text{C}$  NMR spectrum of compound 6 (125MHz,  $\text{CDCl}_3$ )

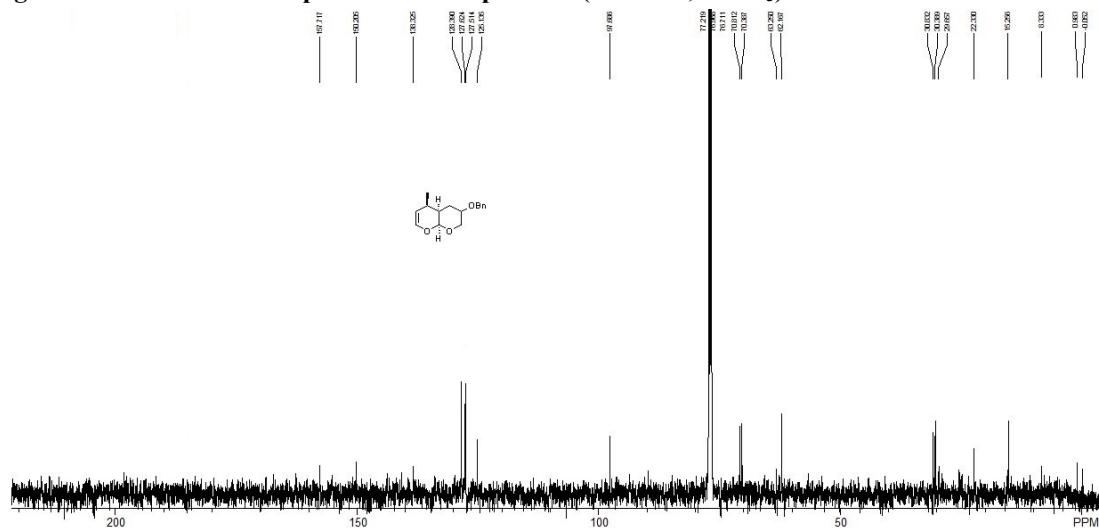

Figure S15. The  $^1\text{H}$  NMR spectrum of compound 7 (500 MHz,  $\text{CDCl}_3$ )

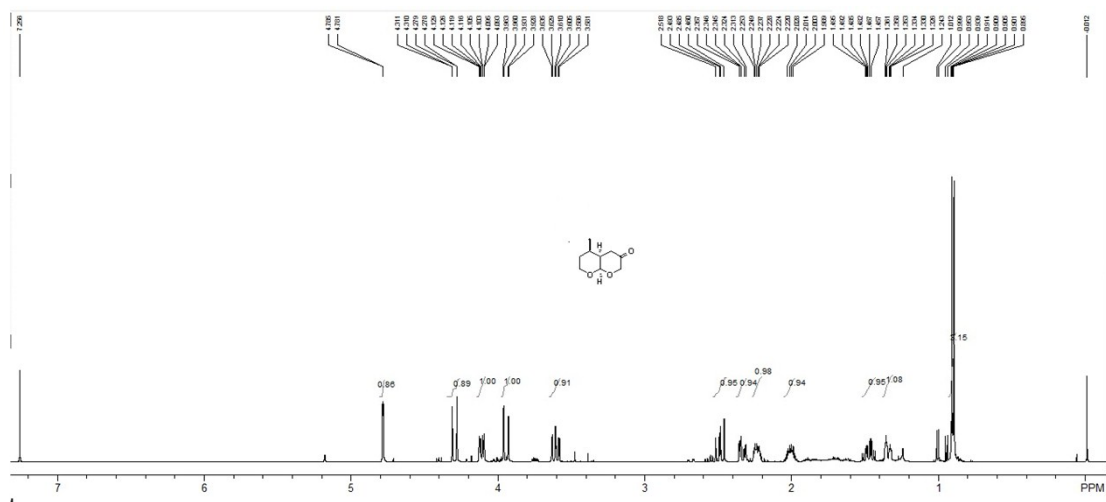

Figure S16. The  $^{13}\text{C}$  NMR spectrum of compound 7 (125MHz,  $\text{CDCl}_3$ )

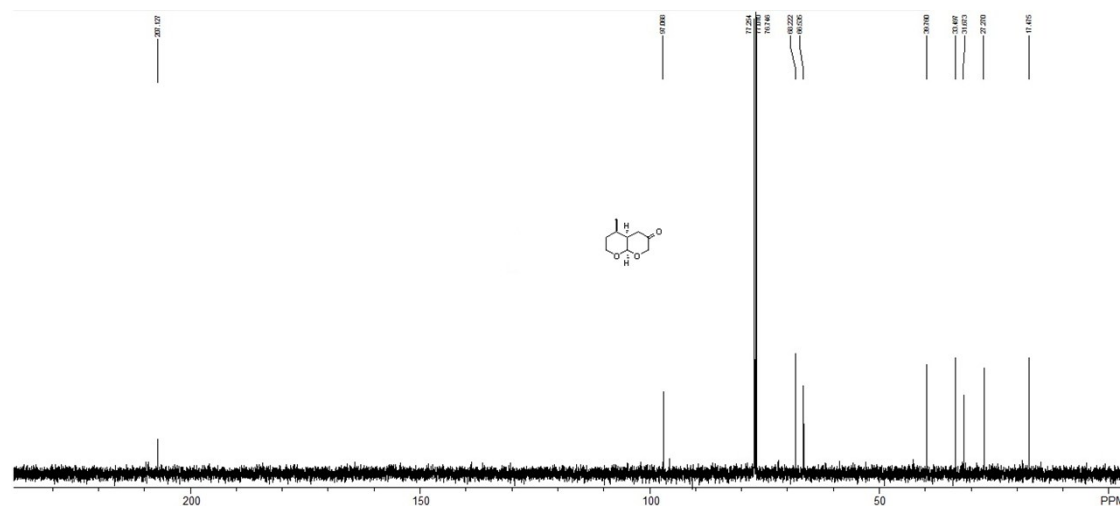

Figure S17. The  $^1\text{H}$  NMR spectrum of compound 8 (500 MHz,  $\text{CDCl}_3$ )

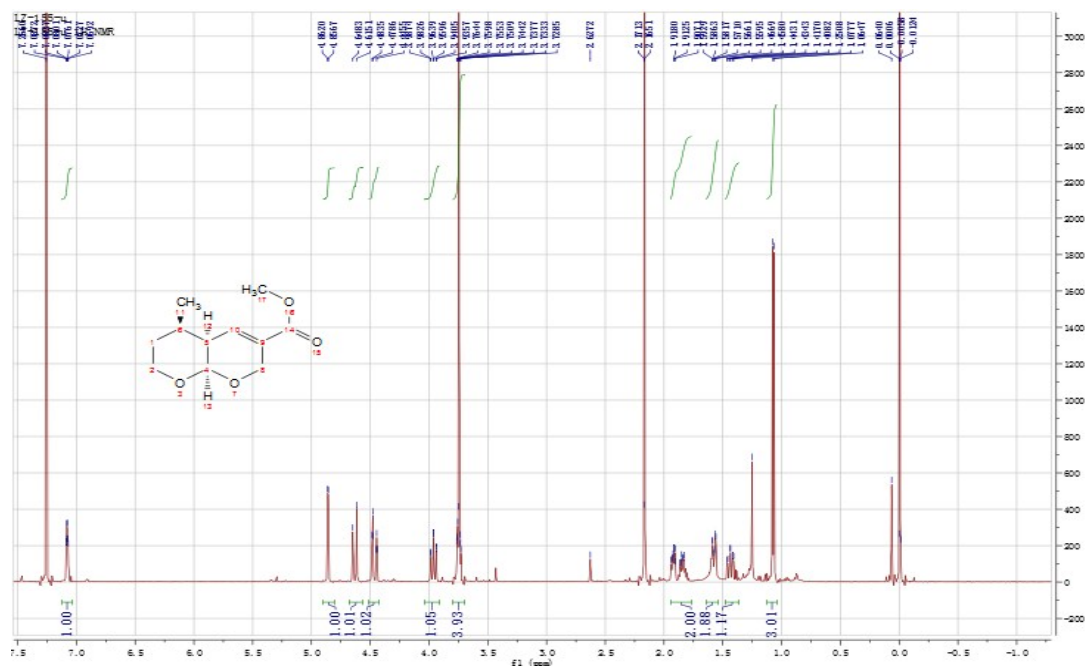

Figure S18. The  $^{13}\text{C}$  NMR spectrum of compound 8 (125MHz,  $\text{CDCl}_3$ )



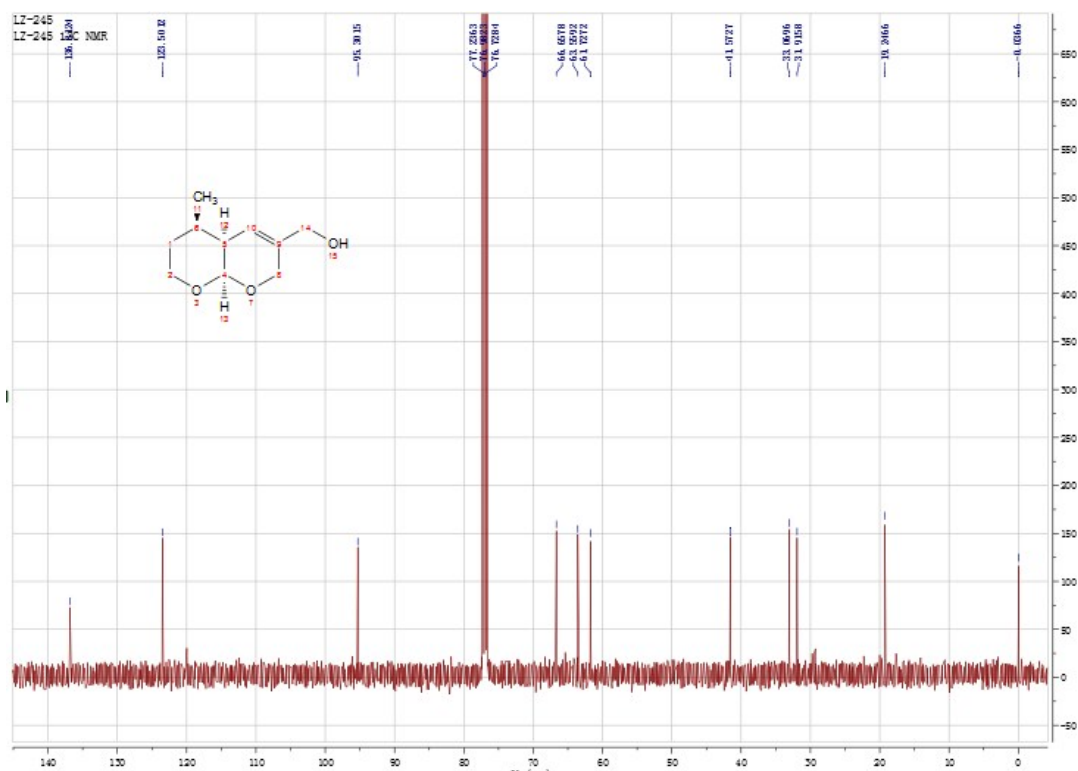

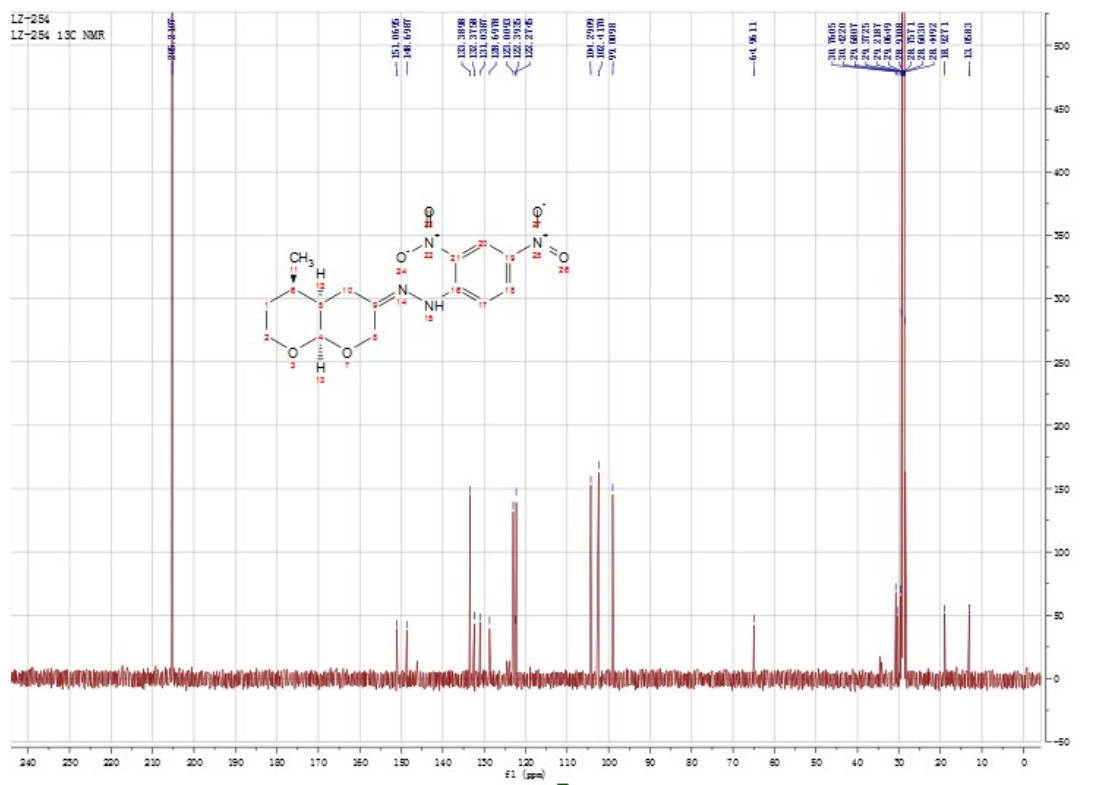

## VIII. Crystal data and structure refinement of compound 9

|                        |                                                               |
|------------------------|---------------------------------------------------------------|
| Empirical formula      | C <sub>15</sub> H <sub>18</sub> N <sub>4</sub> O <sub>6</sub> |
| Formula weight         | 350.33                                                        |
| Temperature            | 140(2) K                                                      |
| Wavelength             | 1.54178 Å                                                     |
| Crystal system         | Monoclinic                                                    |
| Space group            | P2 <sub>1</sub> /c                                            |
| Unit cell dimensions   | a = 5.76250(10) Å<br>b = 23.3095(5) Å<br>c = 11.9536(2) Å     |
| Volume                 | 1558.29(5) Å <sup>3</sup>                                     |
| Z                      | 4                                                             |
| Density (calculated)   | 1.493 Mg/m <sup>3</sup>                                       |
| Absorption coefficient | 0.995 mm <sup>-1</sup>                                        |
| F(000)                 | 736                                                           |
| Crystal size           | 0.300 x 0.120 x 0.060 mm <sup>3</sup>                         |

|                                   |                                             |
|-----------------------------------|---------------------------------------------|
| Theta range for data collection   | 4.257 to 69.738°.                           |
| Index ranges                      | -6≤h≤6, -24≤k≤27, -14≤l≤14                  |
| Reflections collected             | 8065                                        |
| Independent reflections           | 2854 [R(int) = 0.0488]                      |
| Completeness to theta = 67.679°   | 98.6 %                                      |
| Absorption correction             | Semi-empirical from equivalents             |
| Max. and min. transmission        | 0.7533 and 0.4285                           |
| Refinement method                 | Full-matrix least-squares on F <sup>2</sup> |
| Data / restraints / parameters    | 2854 / 12 / 228                             |
| Goodness-of-fit on F <sup>2</sup> | 1.180                                       |
| Final R indices [I>2sigma(I)]     | R1 = 0.0555, wR2 = 0.1462                   |
| R indices (all data)              | R1 = 0.0629, wR2 = 0.1600                   |
| Extinction coefficient            | 0.0121(13)                                  |
| Largest diff. peak and hole       | 0.800 and -0.851 e.Å <sup>-3</sup>          |

Yellow prism crystals of **9** were obtained by recrystallization in ethyl acetate:acetone(1:4). Crystal data were obtained on Bruker SMART APEX II CCD area detector with graphite monochromated Cu-K $\alpha$  radiation (  $\lambda$  =1.54178 Å) at 140(2) and operating in the  $\Phi$ - $\omega$ scan mode. The structure was solved by direct methods and refined with full-matrix least-squares calculations of  $F^2$  using SHELX-97. The collected data were reduced by using the program SAINT and empirical absorption correction was made by using the SADABS program. The hydrogen atom positions were geometrically idealized and allowed to ride on their parent atoms. Crystallographic data for **9** have been deposited at the Cambridge Crystallographic Data Centre (deposition no. CCDC1402281). Copies of these data can be obtained free of charge via [www.ccdc.cam.ac.uk/conts/retrieving.html](http://www.ccdc.cam.ac.uk/conts/retrieving.html) or from the Cambridge Crystallographic Data Centre, 12, Union Road, Cambridge CB21EZ, UK. [fax: (+44) 1223-336-033; or email: [deposit@ccdc.cam.ac.uk](mailto:deposit@ccdc.cam.ac.uk)].

## IX. Comparison of the Spectra of Natural and Synthetic Secoarguterin (1)

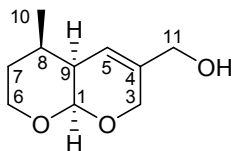

Table 1  $^{13}\text{C}$  and  $^1\text{H}$  NMR spectroscopic data for natural product and compound **1**

| Natural product |                                 |                                          | Synthesized compound <b>1</b>   |                                          |
|-----------------|---------------------------------|------------------------------------------|---------------------------------|------------------------------------------|
| No.             | $\delta_{\text{C}}^{b,c}$ mult. | $\delta_{\text{H}}^a$ mult. ( $J$ in Hz) | $\delta_{\text{C}}^{b,c}$ mult. | $\delta_{\text{H}}^a$ mult. ( $J$ in Hz) |
| 1               | 95.3 <i>d</i>                   | 4.88 ( <i>d</i> , 3.0)                   | 95.3 <i>d</i>                   | 4.87 ( <i>d</i> , 3.0)                   |
| 3a              | 66.7 <i>t</i>                   | 4.41 ( <i>d</i> , 16.0)                  | 65.7 <i>t</i>                   | 4.41 ( <i>d</i> , 16.0)                  |
| 3b              |                                 | 4.36 ( <i>d</i> , 16.0)                  |                                 | 4.36 ( <i>d</i> , 16.0)                  |
| 4               | 136.9 <i>s</i>                  |                                          | 137.4 <i>s</i>                  |                                          |
| 5               | 123.5 <i>d</i>                  | 5.88 ( <i>d</i> , 3.9)                   | 123.5 <i>d</i>                  | 5.88 ( <i>dd</i> , 3.5, 1.5)             |
| 6a              | 61.7 <i>t</i>                   | 3.97 ( <i>t</i> , 11.0)                  | 61.7 <i>t</i>                   | 3.97 ( <i>dt</i> , 11.5, 2.5)            |
| 6b              |                                 | 3.73 ( <i>m</i> )                        |                                 | 3.73 ( <i>m</i> )                        |
| 7a              | 33.1 <i>t</i>                   | 1.54 ( <i>d</i> , 13.1)                  | 33.1 <i>t</i>                   | 1.54 ( <i>dd</i> , 13.0, 2.5)            |
| 7b              |                                 | 1.39 ( <i>m</i> )                        |                                 | 1.40 ( <i>m</i> )                        |
| 8               | 32.0 <i>d</i>                   | 1.80 ( <i>m</i> )                        | 31.9 <i>d</i>                   | 1.78 ( <i>m</i> )                        |
| 9               | 41.7 <i>d</i>                   | 1.76 ( <i>m</i> )                        | 41.6 <i>d</i>                   | 1.75 ( <i>m</i> )                        |
| 10              | 19.3 <i>q</i>                   | 1.02 ( <i>d</i> , 6.1)                   | 19.3 <i>q</i>                   | 1.02 ( <i>d</i> , 6.0)                   |
| 11              | 63.6 <i>t</i>                   | 4.05 ( <i>s</i> )                        | 63.6 <i>t</i>                   | 4.05 ( <i>s</i> )                        |

<sup>a</sup> Recorded at 500 MHz (in  $\text{CDCl}_3$ ;  $\delta$  in ppm); <sup>b</sup> Recorded at 125 MHz; <sup>c</sup> Multiplicities inferred from by DEPT and HMQC experiments.

The NMR data of compound **1** were similar to those of natural product, with similar resonance structures corresponding to six-membered ring deduced by interpretation of the 2D NMR spectra of compound **1** (Table 1).

Chiralcel AD-H column, hexane : *i*PrOH = 200 : 1, 1.0 mL/min

Isolate 1

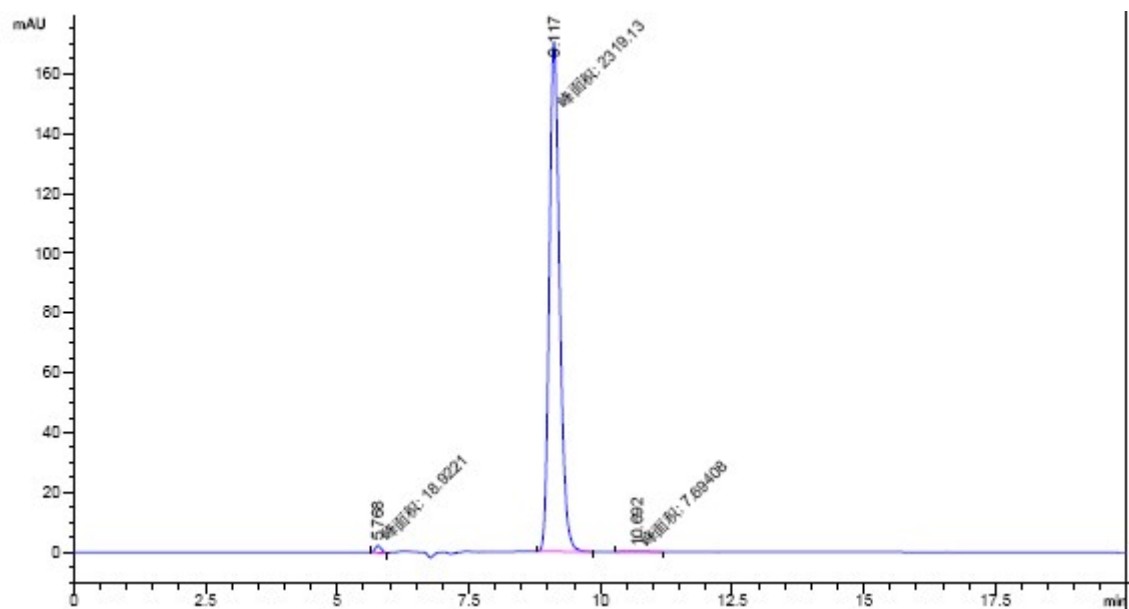

| 峰 #  | 保留时间 [min] | 类型 | 峰宽 [min] | 峰面积 mAU * s | 峰高 [mAU]   | 峰面积 %   |
|------|------------|----|----------|-------------|------------|---------|
| 1    | 5.768      | MM | 0.1245   | 18.92206    | 2.53228    | 0.8067  |
| 2    | 9.117      | MM | 0.2267   | 2319.12524  | 170.49078  | 98.8653 |
| 3    | 10.692     | MM | 0.5081   | 7.69408     | 2.52367e-1 | 0.3280  |
| 总量 : |            |    |          | 2345.74138  | 173.27543  |         |

## Synthesized compound 1

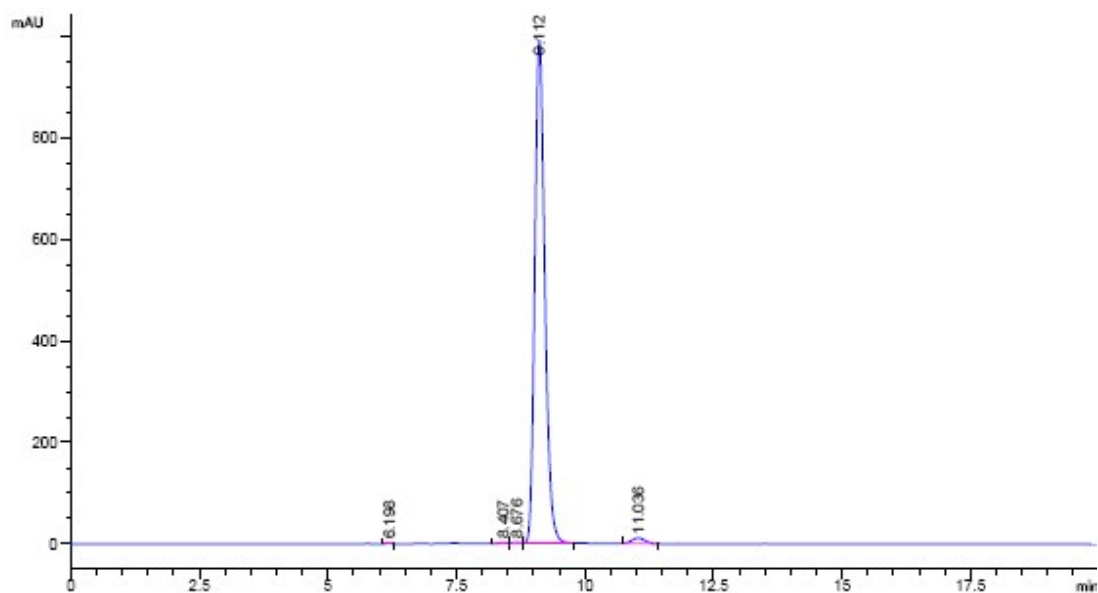

| 峰 #  | 保留时间 [min] | 类型 | 峰宽 [min] | 峰面积 mAU * s | 峰高 [mAU]   | 峰面积 %   |
|------|------------|----|----------|-------------|------------|---------|
| 1    | 6.198      | BV | 0.0856   | 12.54611    | 2.19487    | 0.0920  |
| 2    | 8.407      | VV | 0.1565   | 18.83988    | 1.83065    | 0.1382  |
| 3    | 8.676      | VV | 0.2003   | 30.40620    | 2.32929    | 0.2230  |
| 4    | 9.112      | MM | 0.2250   | 1.33705e4   | 990.33740  | 98.0740 |
| 5    | 11.036     | MM | 0.3007   | 200.78229   | 11.12927   | 1.4728  |
| 总量 : |            |    |          | 1.36331e4   | 1007.82148 |         |
